# Supplementary material for: RabGDI controls axonal midline crossing by regulating Robo1 surface expression
Source: PubMed Central journal article supplement (PMC3520763; doi:10.1186/1749-8104-7-36), 2012-11-09
Supplement: 1749-8104-7-36-S1.pdf [file 1749-8104-7-36-S1.pdf]

# Additional Figure 1

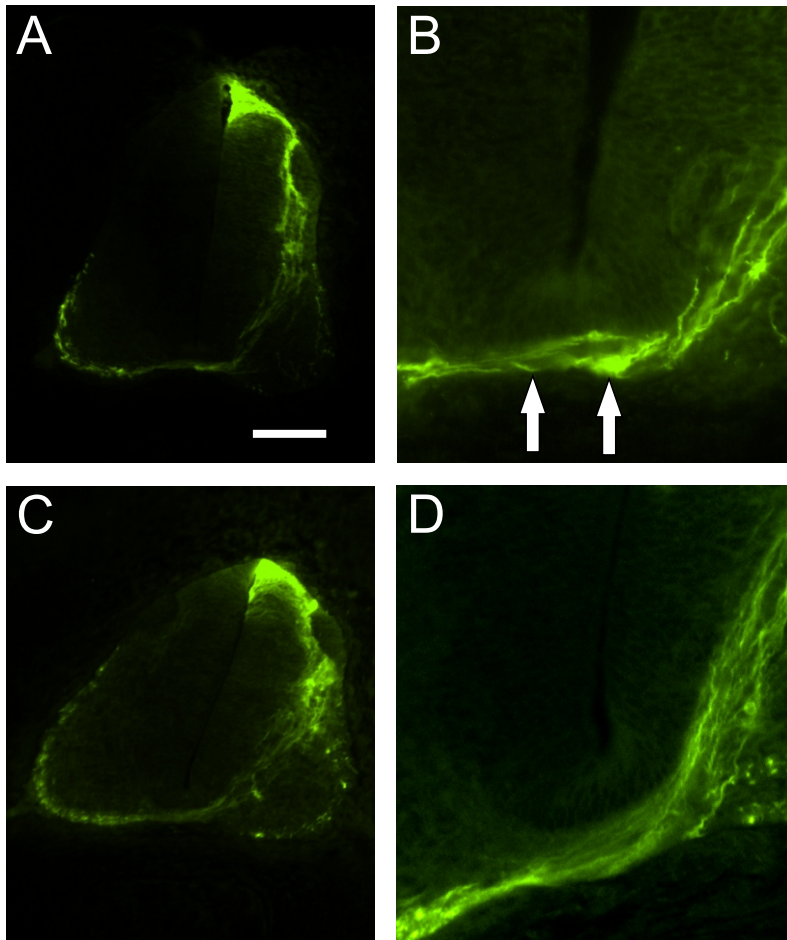

**Dorsal electroporation of dsRabGDI results in the same phenotype as one-sided electroporation.**

Targeting dsRNA derived from RabGDI only into the dorsal spinal cord reproduced the phenotype seen after electroporation of one side of the spinal cord (**A**). A majority of growth cones stalled in the floor plate (arrows in **B**). Aberrant axonal pathfinding was observed at 72.3% of the injection sites after dorsal targeting, compared to 70.6 % after unilateral targeting. Dorsal targeting of an EGFP-expression plasmid did not interfere with axon guidance. All axons had crossed the floor plate by HH25 (**C** and **D**). Bar 100  $\mu\text{m}$ .
