# Supplementary material for: RabGDI controls axonal midline crossing by regulating Robo1 surface expression
Source: PubMed Central journal article supplement (PMC3520763; doi:10.1186/1749-8104-7-36), 2012-11-09
Supplement: 1749-8104-7-36-S2.pdf [file 1749-8104-7-36-S2.pdf]

## Additional Figure 2

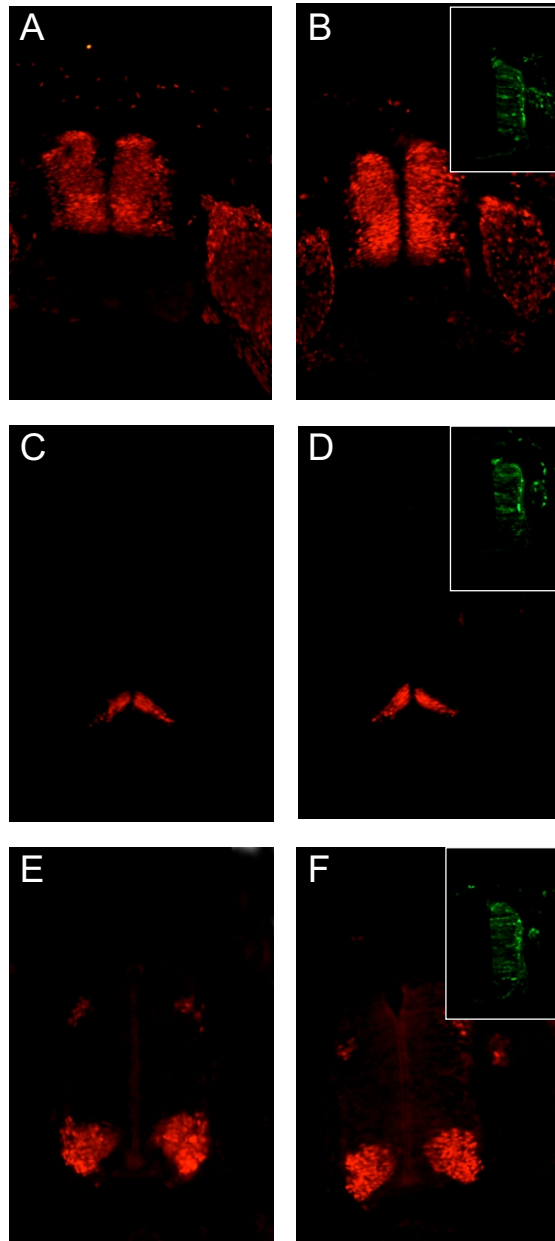

### **Downregulation of RabGDI does not interfere with spinal cord patterning.**

Transverse sections of HH23 embryos were stained with Pax3 (**A** and **B**), Nkx2.2 (**C** and **D**), and Isl-1 (**E** and **F**) to assess spinal cord patterning. The electroporation of dsRabGDI did not change the expression of Pax3 (**B**), Nkx2.2 (**D**), or Isl-1 (**F**). Inserts in **B**, **D**, and **F** show EGFP expression from a co-injected plasmid. **A**, **C**, and **E** show sections taken from a non-injected, age-matched control embryo.
